# Supplementary material for: Longitudinal Analysis of Teacher Technology Acceptance and Its Relationship to Resource Viewing and Academic Performance of College Students during the COVID-19 Pandemic
Source: MDPI journal article supplement (doi:10.3390/su132112167), 2021-11-04
Supplement: s1 [file s1]

Archive with 1 entries (1 files):
- sustainability-1425300-supplementary.pdf
